# Supplementary material for: Tailoring thermoresponsiveness of biocompatible polyethers: copolymers of linear glycerol and ethyl glycidyl ether
Source: Royal Society of Chemistry journal article supplement (doi:10.1039/d3py00064h), 2023-01-01
Supplement: d3py00064h1.pdf [file d3py00064h1.pdf]

## Supporting Information

### Tailoring Thermoresponsiveness of Biocompatible Polyethers: Copolymers of Linear Glycerol and Ethyl Glycidyl Ether

Verena Müller,<sup>a</sup> Rebecca Matthes,<sup>a</sup> Manfred Wagner,<sup>b</sup> Matthias Bros,<sup>c</sup> Philip Dreier<sup>\*,a</sup> and  
Holger Frey<sup>\*,a</sup>

---

<sup>a.</sup> Department of Chemistry, Johannes Gutenberg University, Duesbergweg 10-14, D-55128 Mainz

<sup>b.</sup> Max Planck Institute for Polymer Chemistry, Ackermannweg 10, D-55128 Mainz

<sup>c.</sup> University Medical Centre, Johannes Gutenberg University, Langenbeckstraße 1, D-55101 Mainz.

#### Content

1. Jaacks method for calculation of the reactivity ratios
2. Synthesis of the monomer ethoxy ethyl glycidyl ether (EEGE)
3. NMR characterization of P(EEGE-*co*-EGE)
4. Calculation of copolymer composition and molecular weight
5. SEC data for of P(EEGE-*co*-EGE)
6. MALDI-ToF MS characterization of P(EEGE-*co*-EGE)
7. NMR characterization of P(*lin*G-*co*-EGE)
8. SEC data for P(*lin*G-*co*-EGE)
9. MALDI-ToF MS characterization of P(*lin*G-*co*-EGE)
10. Determination of the reactivity ratios  $r_{\text{EEGE}}$  and  $r_{\text{EGE}}$
11. Investigation of the critical solution behavior of P(*lin*G-*co*-EGE) via turbidimetry
12. Investigation of immune cell viability and immunophenotype of P(*lin*G-*co*-EGE)

## 1. Jaacks method for calculation of the reactivity ratios

The Jaacks method is a simplification of the well-known Mayo-Lewis equation<sup>1</sup> (Eq. S1) for the copolymerization of the monomers M<sub>1</sub> and M<sub>2</sub>.

$$\frac{d[M_1]}{d[M_2]} = \frac{r_1 \frac{[M_1]}{[M_2]} + 1}{r_2 \frac{[M_2]}{[M_1]} + 1} \quad (\text{S1})$$

with  $r_1 = \frac{k_{11}}{k_{12}}$  and  $r_2 = \frac{k_{22}}{k_{21}}$ . The simplification of the Jaacks method is based on the use of an excess of M<sub>1</sub>. Therefore, the active chain ends consist almost completely of M<sub>1</sub> units, and the active chain ends with M<sub>2</sub> units can approximately be neglected.<sup>2</sup> The rates of monomer consumption can be simplified as followed:

$$-\frac{d[M_1]}{dt} = k_{11}[M_1][P_1^*] \quad (\text{S2})$$

$$-\frac{d[M_2]}{dt} = k_{12}[M_2][P_1^*] \quad (\text{S3})$$

where P<sub>1</sub><sup>\*</sup> is the active chain end with a M<sub>1</sub> unit. The division of Eq. S2 and Eq. S3 results in

$$\frac{d[M_1]}{d[M_2]} = r_1 \frac{[M_1]}{[M_2]} \quad (\text{S4})$$

which can also be obtained from Eq. S1 for  $r_1 \frac{[M_1]}{[M_2]} \gg 1$  and  $r_2 \frac{[M_2]}{[M_1]} \ll 1$ .<sup>2</sup> Integration of Eq. S4 yields Eq. S5.

$$\log\left(\frac{[M_1]_t}{[M_1]_0}\right) = r_1 \cdot \log\left(\frac{[M_2]_t}{[M_2]_0}\right) \quad (\text{S5})$$

The integrated equation (Eq. S5) is valid also for high conversions, if the excess of M<sub>1</sub> over M<sub>2</sub> is

ensured.<sup>2</sup> In a plot of  $\log\left(\frac{[M_1]_t}{[M_1]_0}\right)$  vs.  $\log\left(\frac{[M_2]_t}{[M_2]_0}\right)$ ,  $r_1$  can be obtained as the slope of the graph. For non-terminal models,  $r_2$  can be calculated from  $r_1$ , since  $r_1 \cdot r_2 = 1$ .<sup>2,3</sup>

## 2. Synthesis of the monomer ethoxy ethyl glycidyl ether (EEGE)

The monomer EEGE was synthesized according to a literature synthesis by Fitton *et al.*<sup>4</sup> Fig. S1 shows the <sup>1</sup>H NMR spectrum of the synthesized EEGE.

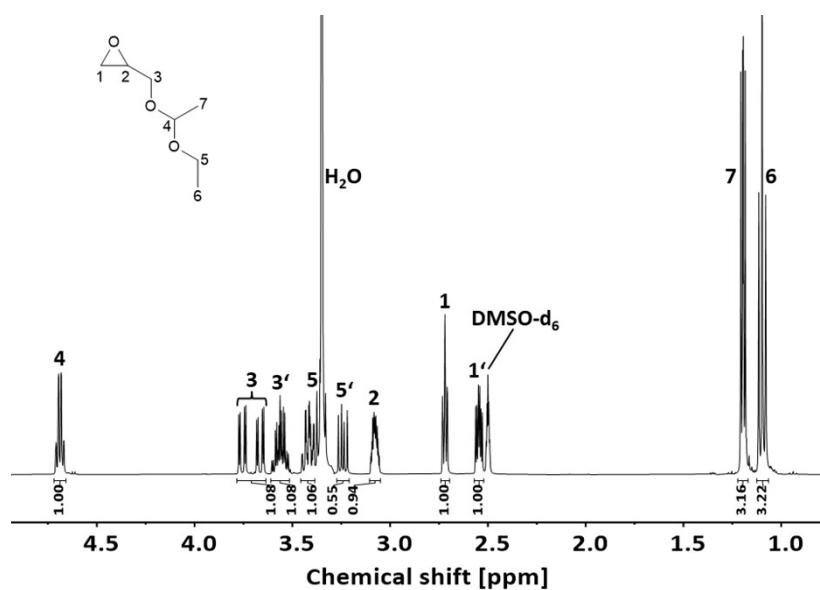

**Fig. S1:**  $^1\text{H}$  NMR spectrum (400 MHz,  $\text{DMSO-d}_6$ ) of the synthesized monomer EEGE.

### 3. NMR characterization of P(EEGE-co-EGE)

The  $^1\text{H}$  NMR spectra of all synthesized homo- and copolymers are shown in Fig. S2, the  $^{13}\text{C}$  NMR spectra are summarized in Fig. S3.

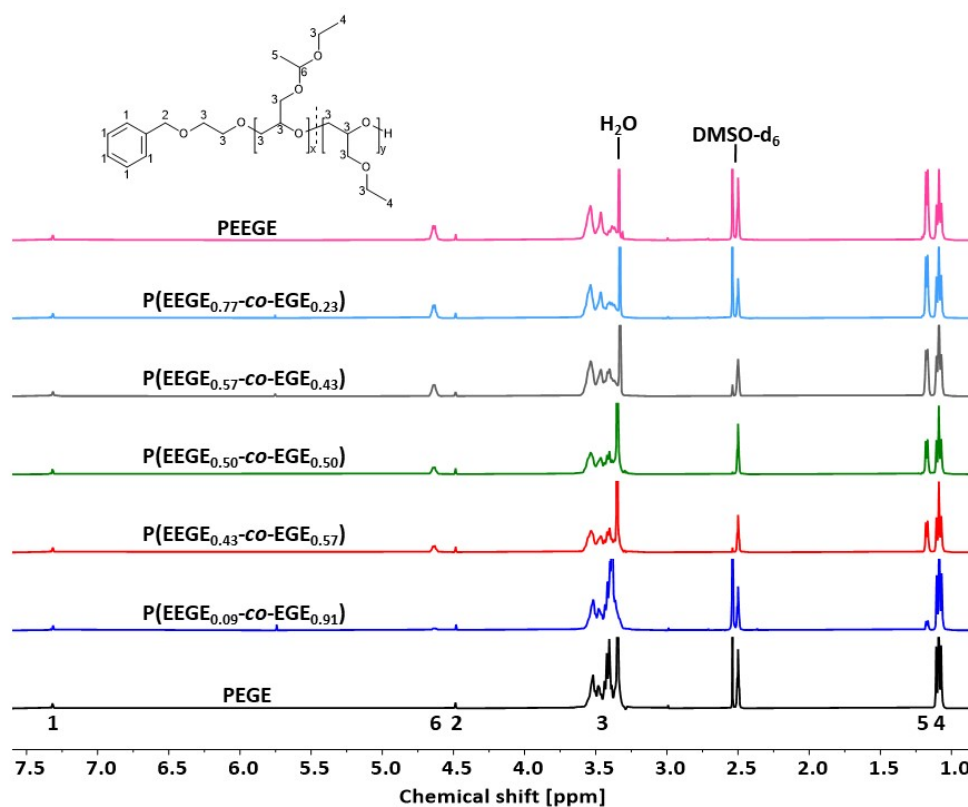

**Fig. S2:** Stacked  $^1\text{H}$  NMR spectra (400 MHz,  $\text{DMSO-d}_6$ ) of combined P(EEGE-co-EGE) copolymers and the homopolymers PEGE and PEEGE.

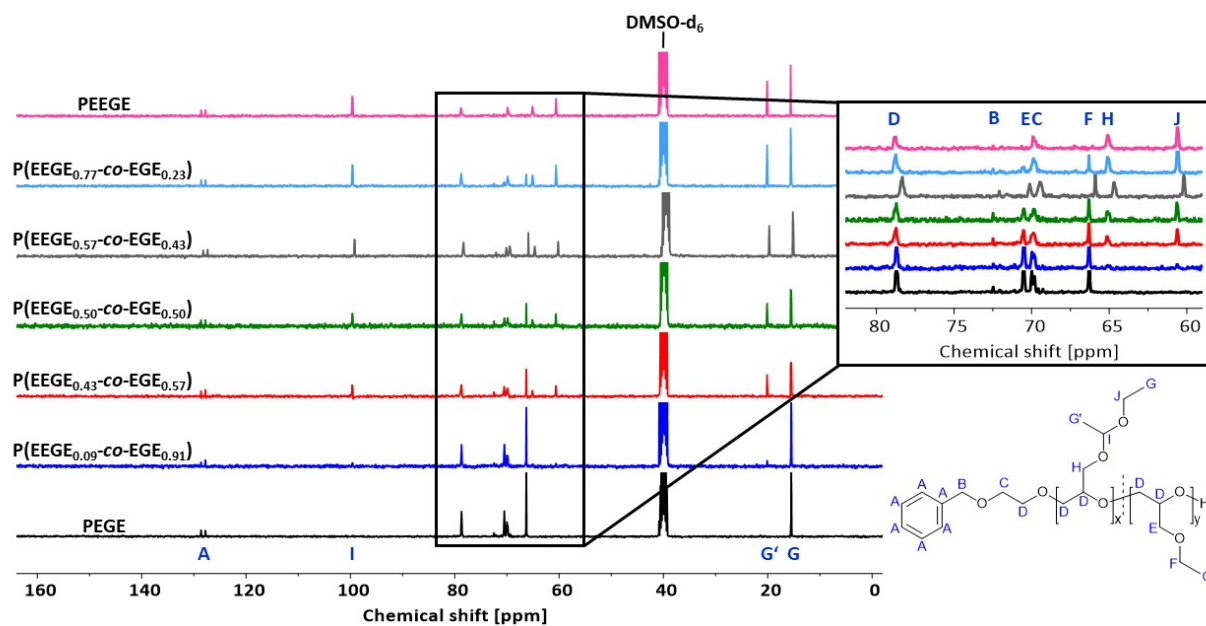

**Fig. S3:** Stacked  $^{13}\text{C}$  NMR spectra (100 MHz,  $\text{DMSO-d}_6$ ) of combined P(EEGE-co-EGE) copolymers and the homopolymers PEGE and PEEGE.

#### 4. Calculation of copolymer composition and molecular weight

Calculation of the copolymer composition is exemplary shown for sample P(EEGE<sub>0.43</sub>-co-EGE<sub>0.57</sub>) (Fig. S4).

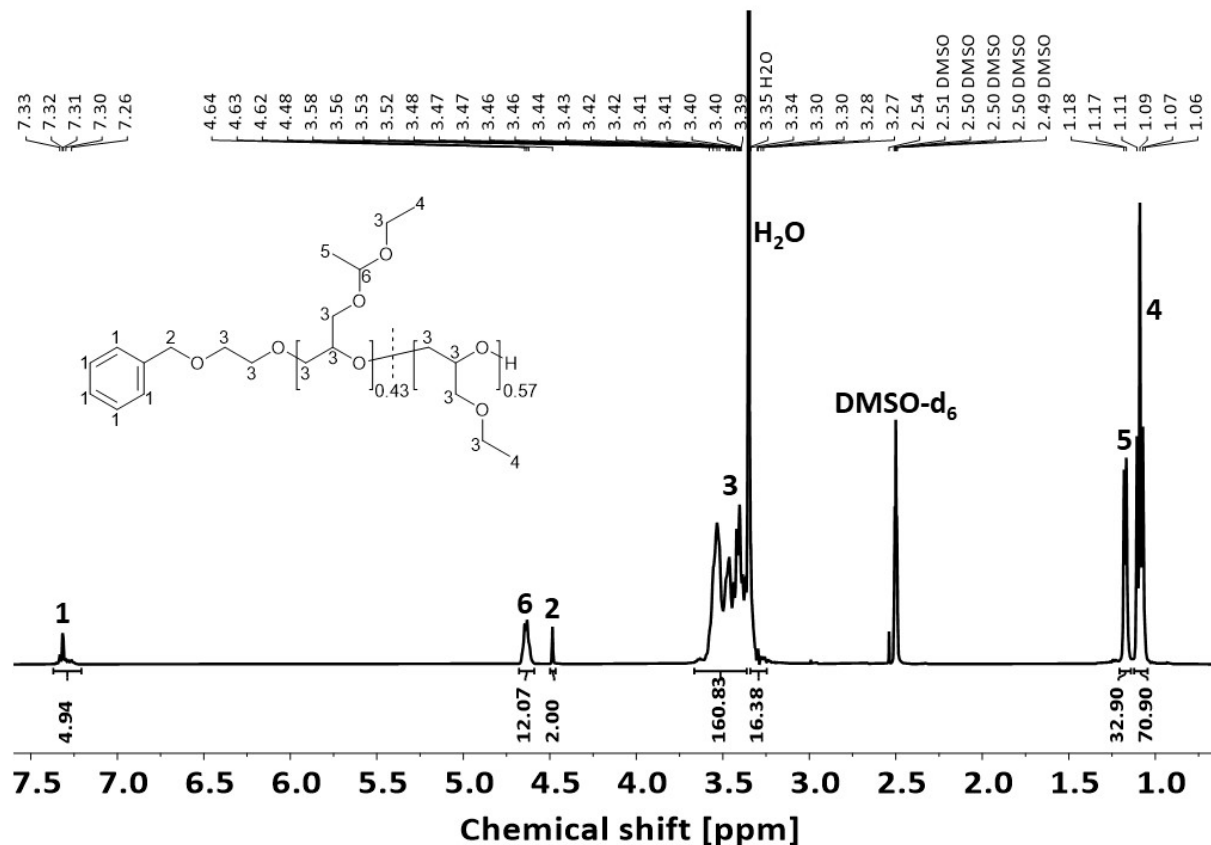

**Fig. S4:**  $^1\text{H}$  NMR spectrum (400 MHz,  $\text{DMSO-d}_6$ ) of P(EEGE<sub>0.43</sub>-co-EGE<sub>0.57</sub>).

The spectrum was referenced to the solvent signal (DMSO- $d_6$ ,  $\delta = 2.50$  ppm). The integral of the methylene group of the initiator end group (integral 2) was defined as 2. The degree of polymerization of EEGE ( $DP_{EEGE}$ ) is calculated by division of integral 5 by 3 protons of the methyl group (H5). For the calculation of the degree of polymerization of EGE ( $DP_{EGE}$ ), the number of protons of integral 5 is subtracted from integral 4.  $DP_{EGE}$  is then calculated by division by 3 protons of the methyl group (H4) (Eq. S6).

$$DP_{EGE} = \frac{\text{integral 4} - \text{integral 5}}{3} \quad (\text{S6})$$

The molecular weight is calculated by multiplying the degree of polymerization of the monomers with the corresponding molar mass and addition of the molar mass of the end groups.

## 5. SEC data for P(EEGE-*co*-EGE)

SEC measurements were performed in DMF and toluene as internal standard and calibrated with PEG standards. The SEC curves of additional P(EEGE-*co*-EGE) copolymers are shown in Fig. S5. The molecular weight distributions are narrow and monomodal for all copolymers.

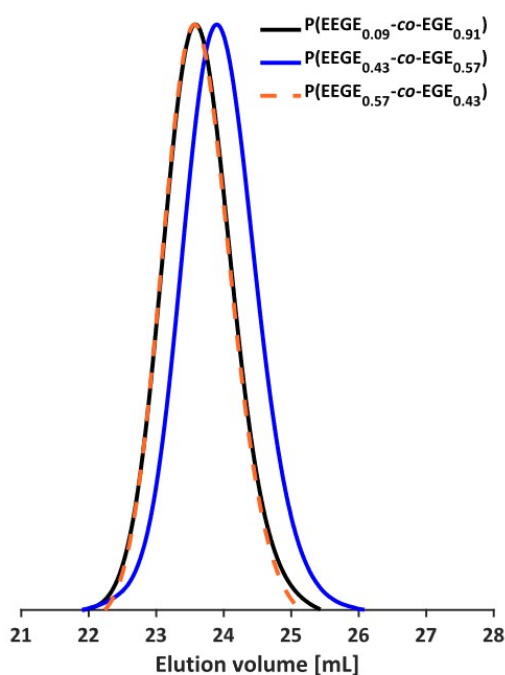

Fig. S5: Additional SEC curves (DMF, PEG calibration) of P(EEGE-*co*-EGE) copolymers.

## 6. MALDI-ToF MS characterization of P(EEGE-*co*-EGE)

An enlargement of the MALDI-ToF mass spectrum of P(EEGE<sub>0.57</sub>-co-EGE<sub>0.43</sub>) (see Fig. 1) is shown in Fig. S6 where a glycidol repeating unit is highlighted. Parts of the acetal protecting groups of the EEGE units were deprotected by the acidic salt additive trifluoroacetic acid potassium salt during the measurement.

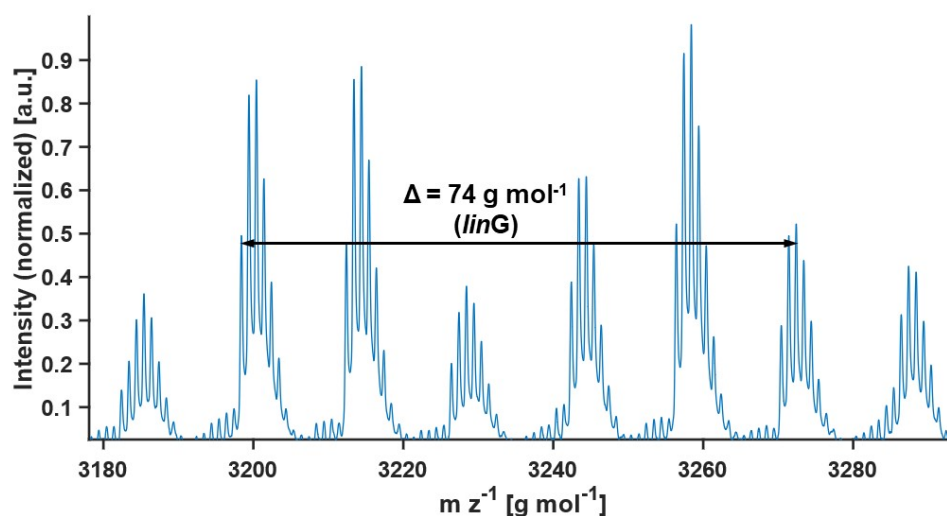

**Fig. S6:** Enlargement of the MALDI-ToF mass spectrum of P(*linG*<sub>0.57</sub>-co-EGE<sub>0.43</sub>). The repeating unit of the deprotected glycidol is highlighted. Matrix: *trans*-2-[3-(4-*tert*-butylphenyl)-2-methyl-2-propenylidene]-malononitrile (DCTB), salt additive: trifluoroacetic acid potassium salt.

## 7. NMR characterization of P(*linG*-co-EGE)

The <sup>1</sup>H NMR spectra of all deprotected homo- and copolymers are shown in Fig. S7, the <sup>13</sup>C NMR spectra are summarized in Fig. S8. The spectra display no acetal proton signals, the cleavage of the EEGE acetal protecting groups has been successful.

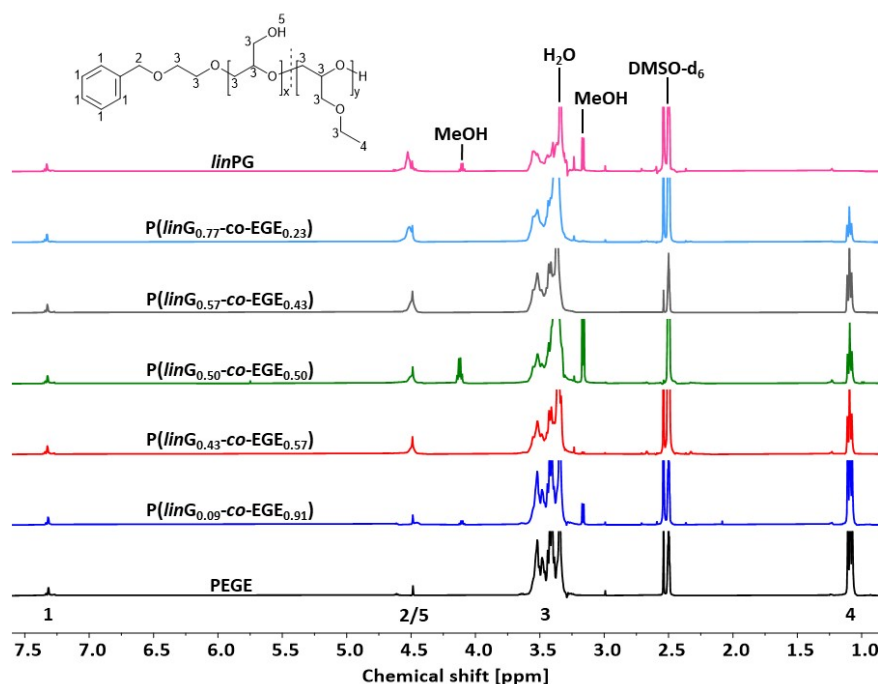

**Fig. S7:** Stacked <sup>1</sup>H NMR spectra (400 MHz, DMSO-d<sub>6</sub>) of combined P(*linG*-co-EGE) copolymers and the homopolymers PEGE and *linPG*.

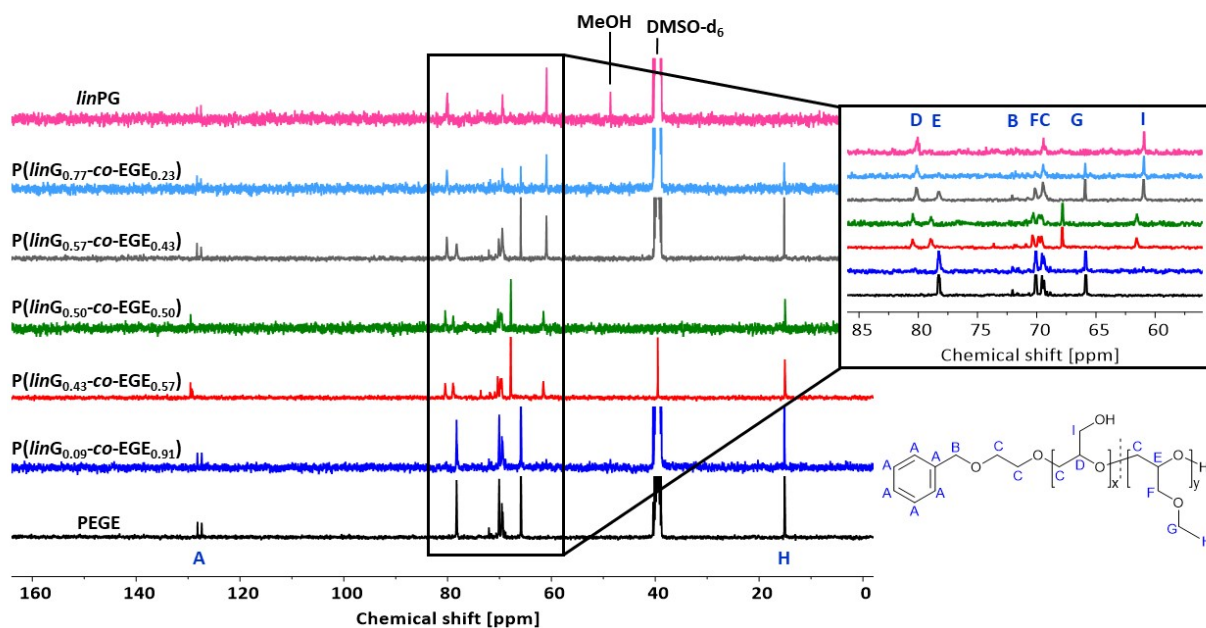

**Fig. S8:** Stacked  $^{13}\text{C}$  NMR spectra (100 MHz,  $\text{DMSO-d}_6$ ) of combined  $P(\text{linG-co-EGE})$  copolymers and the homopolymers PEGE and  $\text{linPG}$ .

## 8. SEC data for $P(\text{linG-co-EGE})$

The SEC curves of additional  $P(\text{linG-co-EGE})$  copolymers are shown in Fig. S9. The molecular weight distributions are narrow and monomodal for all copolymers but  $P(\text{linG}_{0.57}\text{-co-EGE}_{0.43})$ . The elugram of this copolymer is broadened towards lower elution volume which is possibly caused by aggregation during the SEC measurement since no allylic initiation is observed in the  $^1\text{H}$  NMR spectrum and the MALDI-ToF mass spectrum (see Fig. S11, ESI).

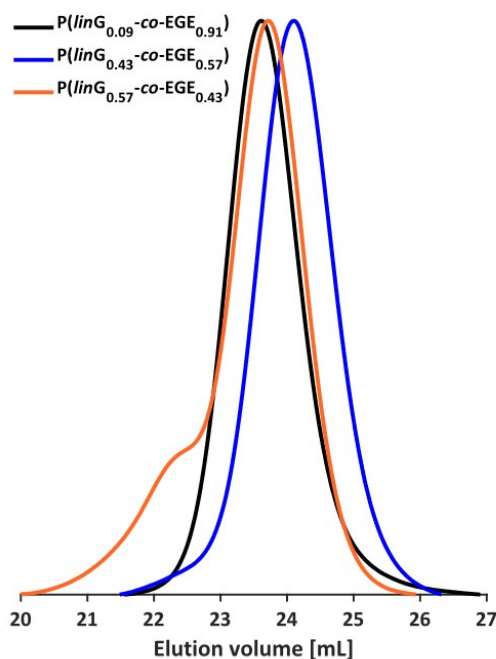

**Fig. S9:** Additional SEC curves (DMF, PEG calibration) of  $P(\text{linG-co-EGE})$  copolymers.

Fig. S10 shows the shift in elution volume of the deprotected  $P(\text{linG}_{0.77}\text{-co-EGE}_{0.23})$  copolymer compared to the protected  $P(\text{EEGE}_{0.77}\text{-co-EGE}_{0.23})$  copolymer. Due to the abstraction of the acetal protecting group, the molecular weight of the deprotected copolymer  $P(\text{linG}_{0.77}\text{-co-EGE}_{0.23})$  decreases during the deprotection and therefore the elution volume increases.

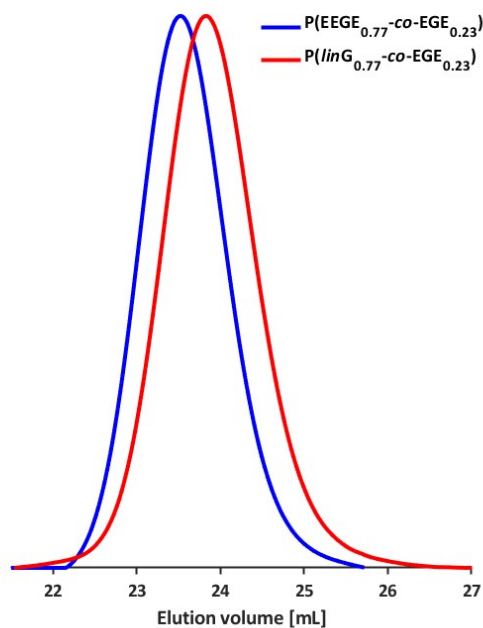

**Fig. S10:** Comparison of SEC traces (DMF, PEG calibration) of the protected  $P(\text{EEGE}_{0.77}\text{-co-EGE}_{0.23})$  copolymer and the unprotected  $P(\text{linG}_{0.77}\text{-co-EGE}_{0.23})$  copolymer.

### 9. MALDI-ToF MS characterization of $P(\text{linG-co-EGE})$

All  $P(\text{linG-co-EGE})$  copolymers and the homopolymers PEGE and *lin*PG were characterized via MALDI-ToF MS. For all samples but *lin*PG, DCTB was chosen as matrix and KTFA as salt additive. The matrix of *lin*PG was  $\alpha$ -cyano-4-hydroxycinnamic acid (HCCA) and lithium chloride was added as salt additive. Fig. S11 shows an exemplary MALDI-ToF mass spectrum of the copolymer  $P(\text{linG}_{0.57}\text{-co-EGE}_{0.43})$ .

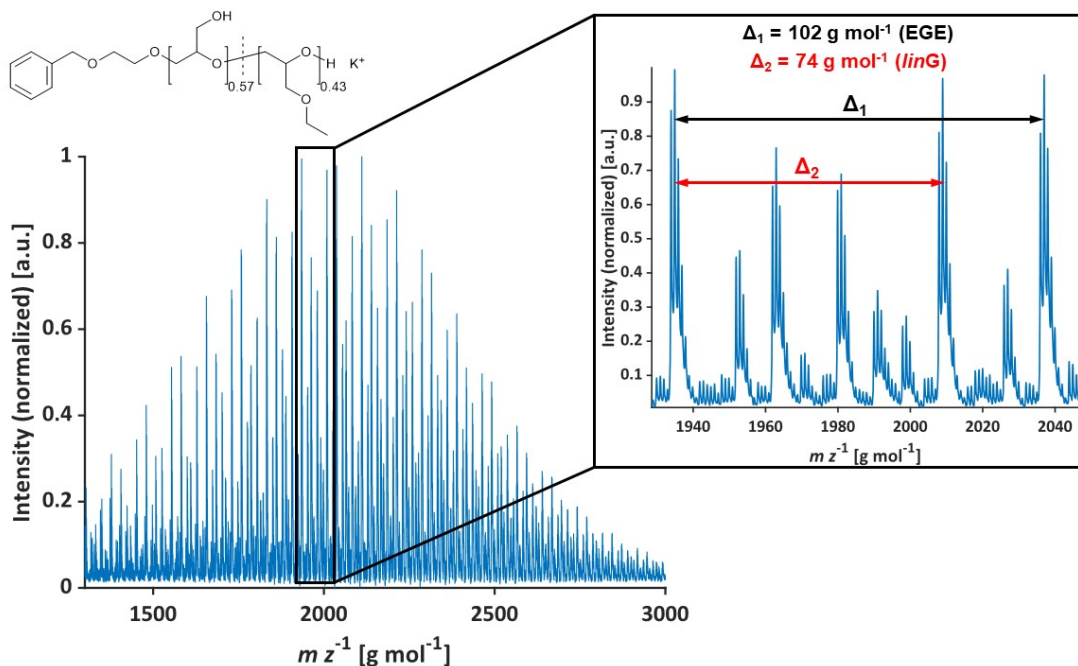

**Fig. S11:** MALDI-ToF mass spectrum of  $P(\text{linG}_{0.57}\text{-co-EGE}_{0.43})$ . Matrix: *trans*-2-[3-(4-*tert*-butylphenyl)-2-methyl-2-propenylidene]malononitrile (DCTB), salt additive: trifluoroacetic acid potassium salt.



## 10. Determination of the reactivity ratios $r_{\text{EEGE}}$ and $r_{\text{EGE}}$

The monomer consumption was detected by the decrease of the proton signals in the  $^1\text{H}$  NMR spectra. Since the chemical shifts of the monomer proton signals of EGE and EEGE are similar, only the non-overlapping part of one proton signal of the epoxide methylene group of each monomer is considered (red frame in Fig. S12).

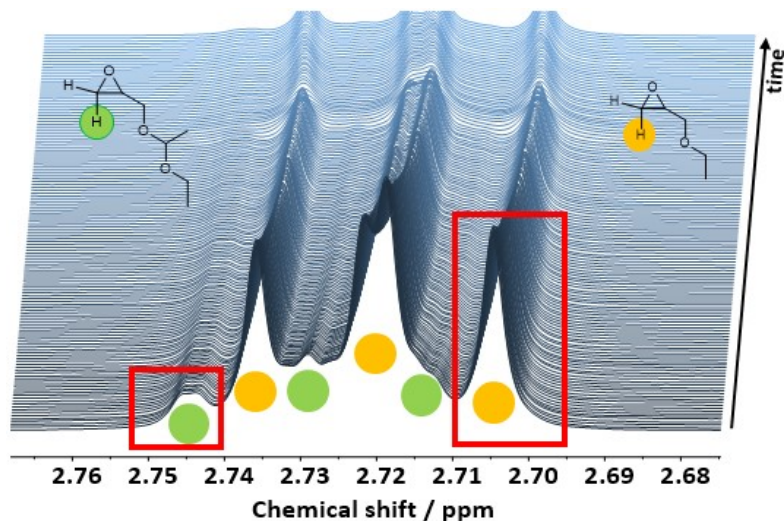

**Fig. S12:** *In situ*  $^1\text{H}$  NMR kinetics study (300 MHz,  $\text{DMSO-d}_6$ ) of the anionic copolymerization of EEGE and EGE at  $25^\circ\text{C}$ .

## 11. Investigation of the critical solution behavior of $\text{P}(\text{linG-co-EGE})$ via turbidimetry

The data points of the turbidimetry vs. temperature curves were fitted by the following equation:

$$y = A_1 + (A_2 - A_1) \cdot \left[ \frac{p}{1 + 10^{(\log(m_1 - x)h_1)}} + \frac{1 - p}{1 + 10^{(\log(m_2 - x)h_2)}} \right] \quad (\text{S7})$$

The cloud point temperature  $T_{\text{cp}}$  is defined as the temperature with 50% transmittance.

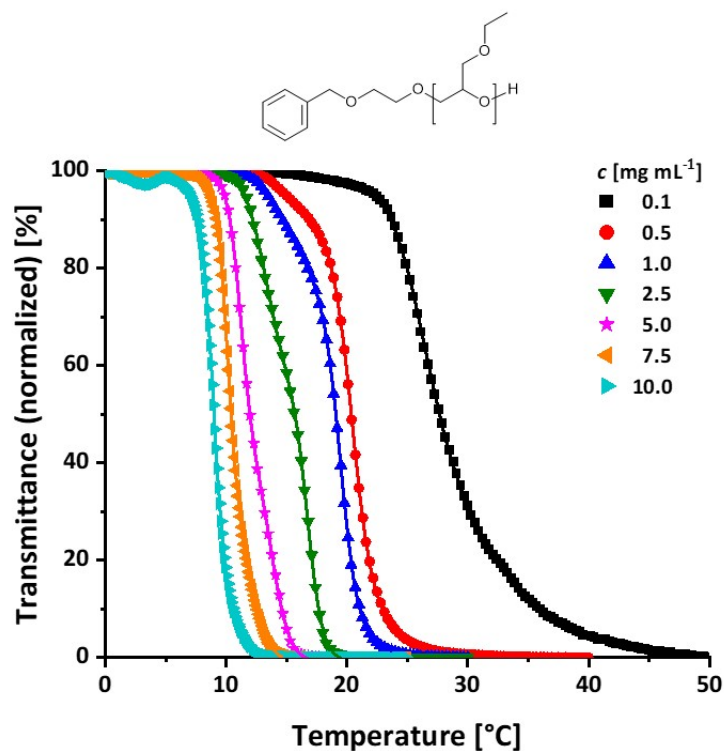

Fig. S13: Transmittance vs. temperature plot of the homopolymer PEGE. Straight lines shows sigmoidal fit to determine  $T_{cp}$  at 50% transmittance.

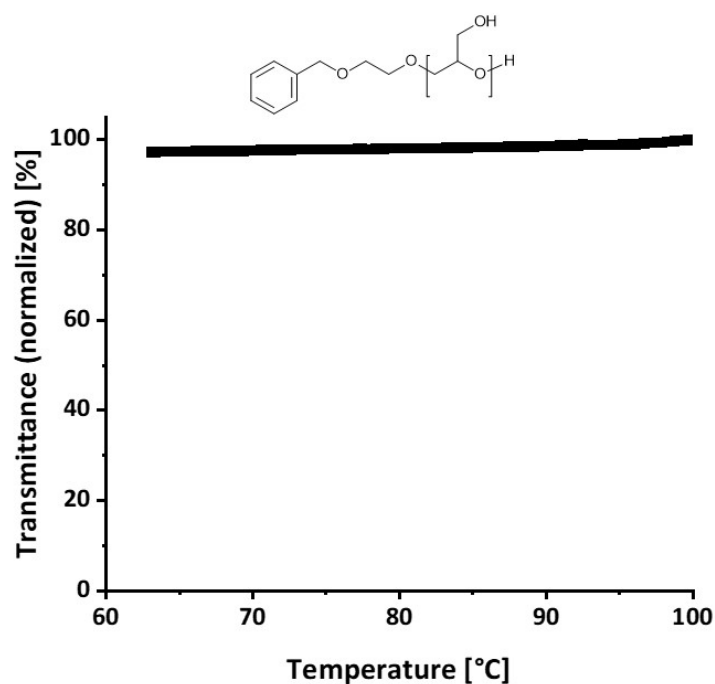

Fig. S14: Transmittance vs. temperature plot of the homopolymer *lin*PG ( $c = 10.0 \text{ mg mL}^{-1}$ ). There is no change in transmittance, the  $T_{cp}$  of *lin*PG is above the measurable temperature area of water.

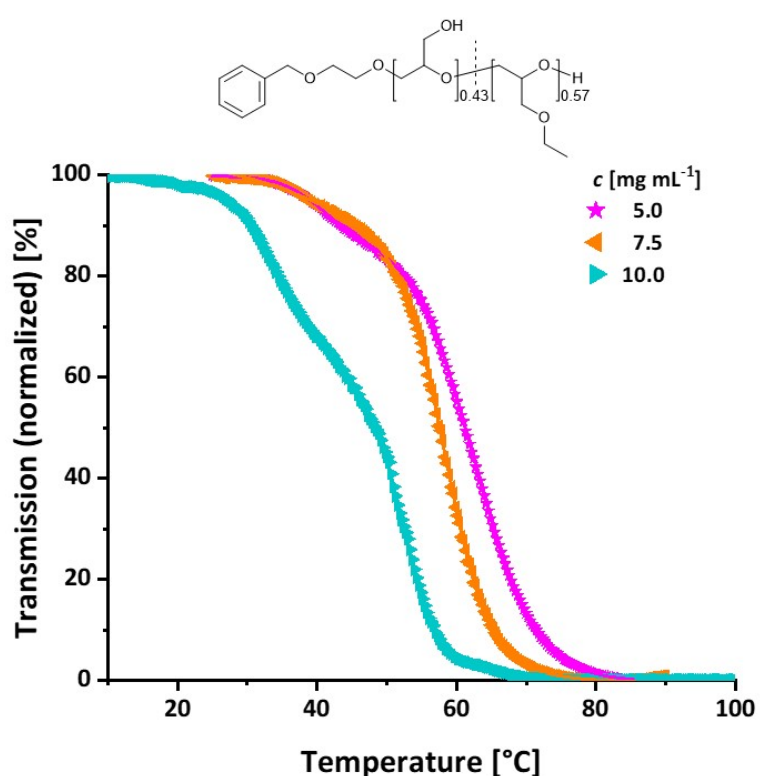

Fig. S15: Transmittance vs. temperature plot of the copolymer  $P(linG_{0.43}\text{-co-EGE}_{0.57})$ . Straight lines shows sigmoidal fit to determine  $T_{cp}$  at 50% transmittance.

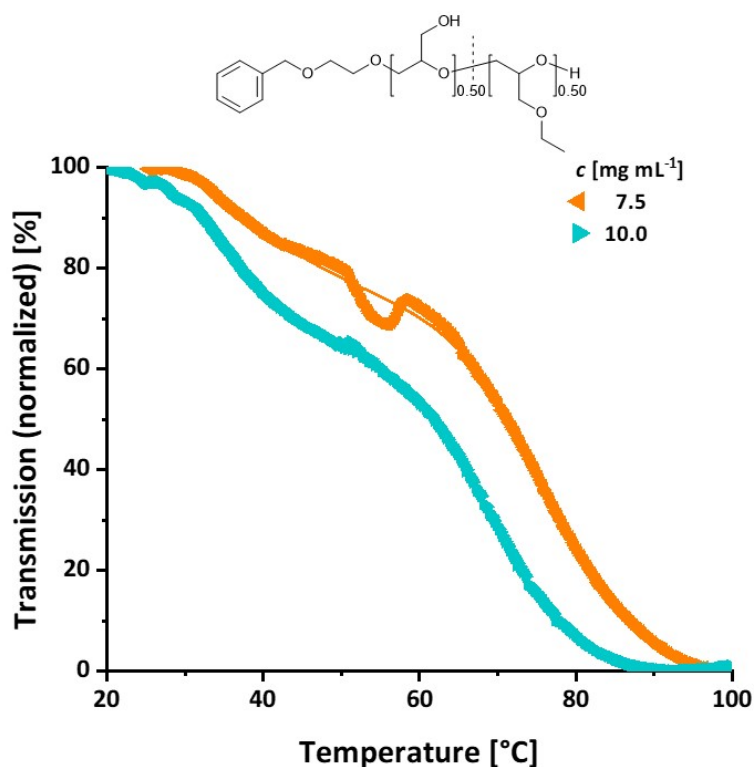

Fig. S16: Transmittance vs. temperature plot of the copolymer  $P(linG_{0.50}-co-EGE_{0.50})$ . Straight lines shows sigmoidal fit to determine  $T_{cp}$  at 50% transmittance.

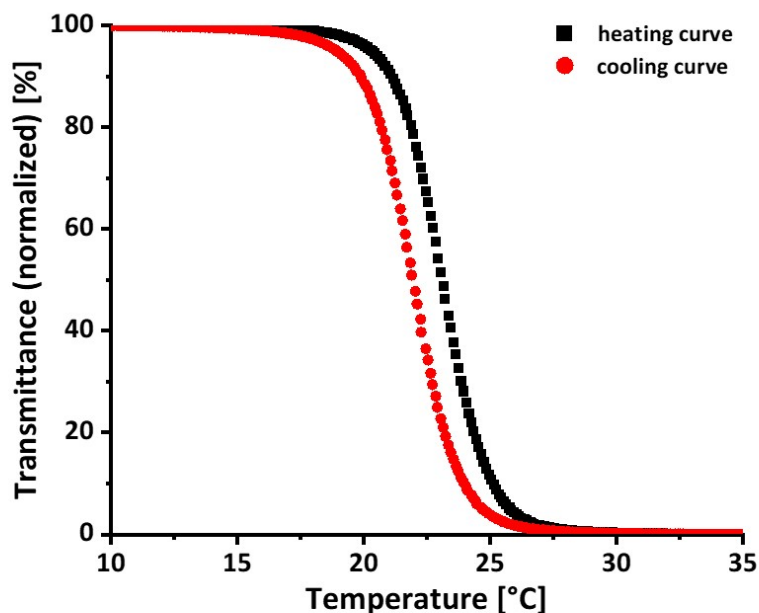

Fig. S17: Transmittance vs. temperature plot of heating and cooling curves of the copolymer  $P(linG_{0.09}-co-EGE_{0.91})$  with a concentration of  $c = 2.5 \text{ mg mL}^{-1}$  showing a negligibly small hysteresis.

## 12. Investigation of immune cell viability and immunophenotype of $P(linG-co-EGE)$

The cell viability of  $P(linG_{0.57}-co-EGE_{0.43})$  and the reference monomethyl poly(ethylene glycol) (mPEG) was investigated via fluorescence-activated cell scanning (FACS) for dendritic cells (DC), polymorphonuclear cells (PMN) and T cells, the immunology was investigated via expression of the surface protein CD80 for dendritic cells (DC) and polymorphonuclear cells (PMN), as shown in Fig. S18.

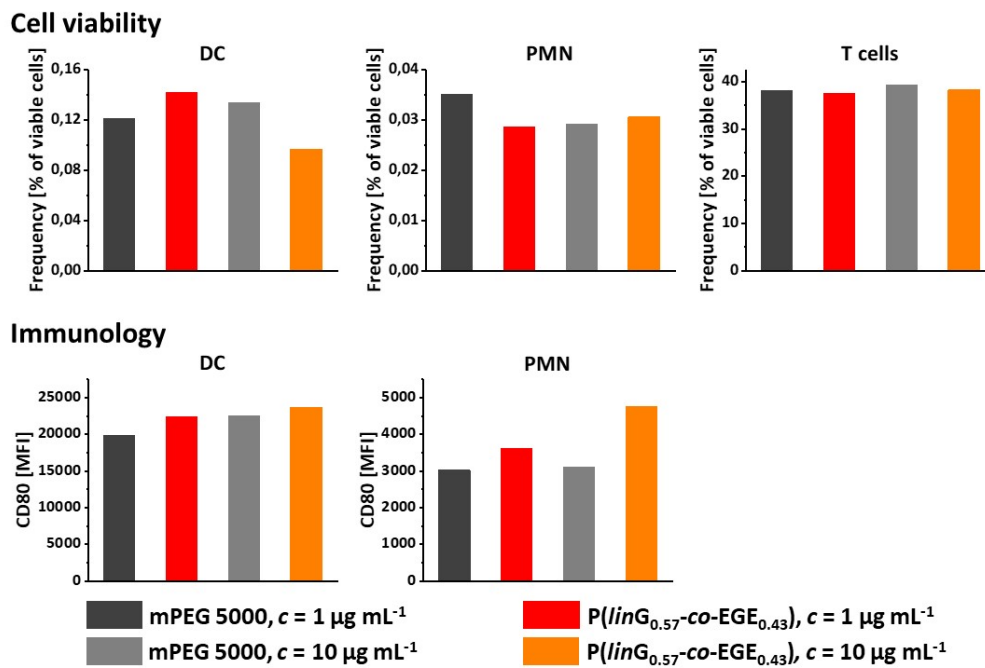

**Fig. S18:** Top: Cell viability of  $P(\text{linG}_{0.57}\text{-co-EGE}_{0.43})$  and mPEG ( $M_n = 5000 \text{ g mol}^{-1}$ ) as a reference for dendritic cells (DC), polymorphonuclear cells (PMN) and T cells. Bottom: Immunology of  $P(\text{linG}_{0.57}\text{-co-EGE}_{0.43})$  and mPEG ( $M_n = 5000 \text{ g mol}^{-1}$ ) as a reference for dendritic cells (DC) and polymorphonuclear cells (PMN) using the surface protein CD80 (MFI: mean fluorescence intensity).

Further immunology tests were carried out via expression of the surface proteins CD86 (Fig. S19, top) and MHCII (Fig. S19, bottom) for the following cell lines: B cells, dendritic cells (DC), natural killer cells (NK), macrophages and polymorphonuclear cells (PMN).

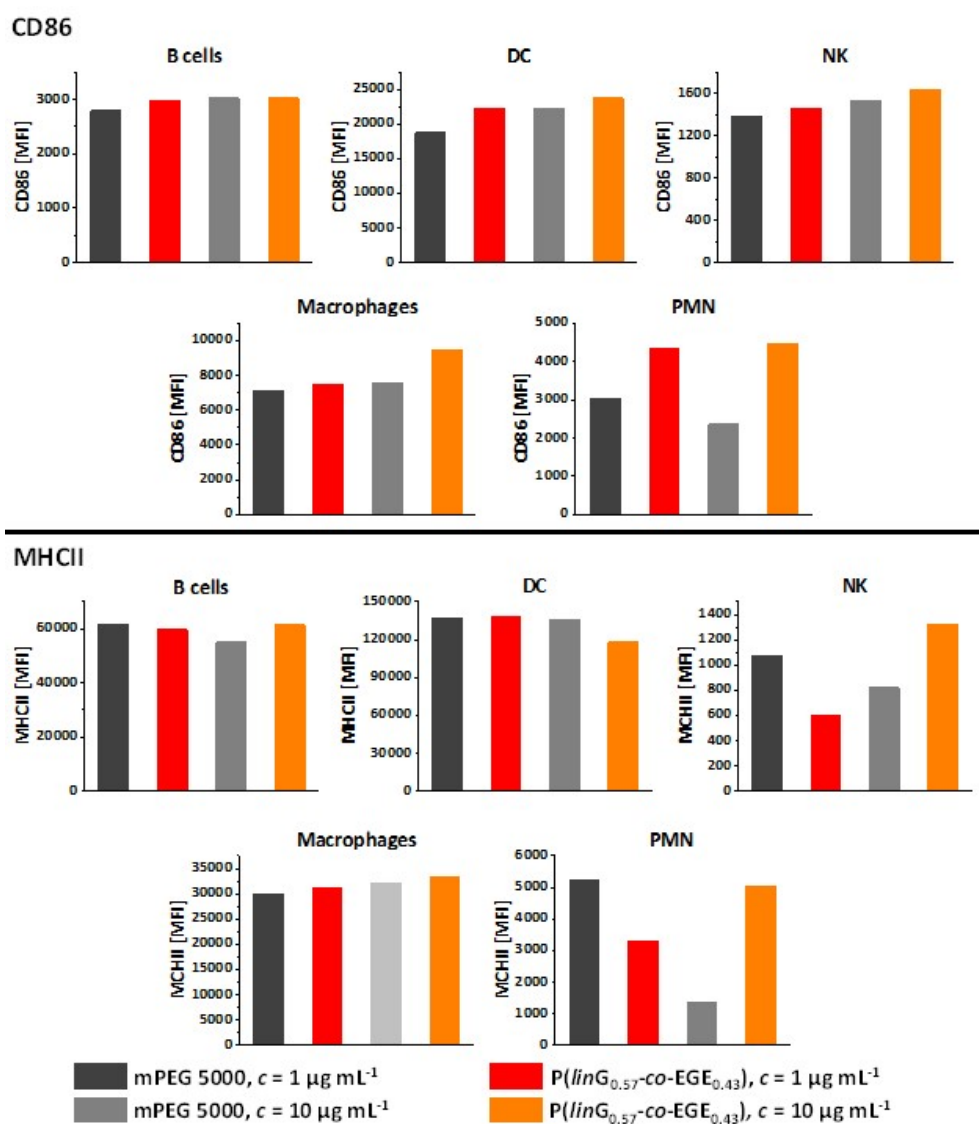

**Fig. S19:** Immunology of  $P(\text{linG}_{0.57}\text{-co-EGE}_{0.43})$  and mPEG ( $M_n = 5000 \text{ g mol}^{-1}$ ) as a reference for several cell lines using the surface proteins CD86 (top) and MCHII (bottom).

## References

- 1 F. R. Mayo and F. M. Lewis, *J. Am. Chem. Soc.*, 1944, **66**, 1594.

- 2 V. Jaacks, *Makromol. Chem.*, 1972, **161**, 161–172.
- 3 F. T. Wall, *J. Am. Chem. Soc.*, 1944, **66**, 2050.
- 4 A. O. Fitton, J. Hill, D. E. Jane, R. Millar, *Synthesis*, 1987, **12**, 1140–1142.
